# Supplementary material for: A novel non-homologous recombination-mediated mechanism for Escherichia coli unilateral flagellar phase variation
Source: PubMed Central journal article supplement — Nucleic Acids Res. 2012 Jan 28;40(10):4530–8. doi: 10.1093/nar/gks040 (PMC3378880; doi:10.1093/nar/gks040), 2012-01-28
Supplement: supp_gks040_nar-02714-d-2011-File008.pdf [file supp_gks040_nar-02714-d-2011-File008.pdf]

**Supplementary Table S1. ORFs between the *pgsA* and *flhD* genes in the P12b genome**

| <b>Locus tag</b> | <b>Gene name</b> | <b>Position of gene</b>       | <b>G+C content (%)</b> | <b>Similar protein(s), strain(s) (Genbank accession No.)</b>                      | <b>% Identical /% similar (No. of aa overlap)</b> | <b>Putative function of protein</b>     |
|------------------|------------------|-------------------------------|------------------------|-----------------------------------------------------------------------------------|---------------------------------------------------|-----------------------------------------|
| c1152            | <i>pgsA</i>      | 1249581..1250129              | 52.8                   | phosphatidylglycerophosphate synthetase, <i>E. coli</i> O157:H7EDL933 (NP_288373) | 100/100(182)                                      | phosphatidylglycerophosphate synthetase |
| c1153            | <i>sdaB</i>      | complement (1251173..1252540) | 57.4                   | L-serine ammonia-lyase 2, <i>E. coli</i> B171 (ZP_03059033)                       | 91/96(455)                                        | L-serine ammonia-lyase                  |
| c1154            | <i>sdaC</i>      | complement (1252601..1253890) | 52.8                   | serine transporter, <i>Klebsiella pneumoniae</i> 342(YP_002236852)                | 92/95(429)                                        | serine transporter                      |
| c1155            |                  | 1254144..1254542              | 52.4                   | transposase, <i>Shewanella putrefaciens</i> CN-32(YP_001184434)                   | 73/83(100)                                        | transposase                             |
| c1156            | <i>insH</i>      | complement (1254581..1255561) | 55.6                   | putative transposase, <i>E. coli</i> APEC O1(YP_001481374)                        | 99/99(326)                                        | transposase                             |
| c1157            | <i>int1157</i>   | 1255726..1256928              | 48.4                   | phage integrase family protein, <i>Actinobacillus minor</i> NM305 (ZP_04752588)   | 50/70(406)                                        | integrase                               |
| c1158            |                  | complement (1256950..1257453) | 54.8                   | IS1 transposase orfB, <i>E. coli</i> SMS-3-5 (NP_569348)                          | 99/99(167)                                        | transposase                             |
| c1159            |                  | complement (1257372..1257599) | 52.6                   | IS1 repressor protein InsA, <i>E. coli</i> ED1a (YP_002397850)                    | 100/100(75)                                       | IS1 repressor protein                   |

|       |             |                                  |      |                                                                           |             |                                   |
|-------|-------------|----------------------------------|------|---------------------------------------------------------------------------|-------------|-----------------------------------|
| c1160 |             | complement<br>(1257840..1258763) | 46.4 | DNA-directed DNA polymerase,<br><i>A. minor</i> NM305(ZP_04752587)        | 34/54(321)  | unknown                           |
| c1161 |             | 1259222..1259725                 | 55.0 | IS1 transposase orfB,<br><i>E. coli</i> SMS-3-5 (NP_569348)               | 99/99(167)  | transposase                       |
| c1162 | <i>flnA</i> | 1259891..1261414                 | 47.6 | FlnA,<br><i>E. coli</i> P12b (ACN58226)                                   | 99/99(477)  | flagellin                         |
| c1163 |             | 1261626..1262639                 | 40.5 | IS605 family transposase orfB,<br><i>E. coli</i> SMS-3-5 (YP_001742549)   | 44/60(375)  | transposase                       |
| c1164 |             | complement<br>(1262730..1263233) | 54.8 | IS1 transposase orfB,<br><i>E. coli</i> SMS-3-5 (YP_001739974)            | 98/98(167)  | transposase                       |
| c1165 |             | complement<br>(1263152..1263379) | 53.5 | IS1 repressor protein InsA,<br><i>E. coli</i> ED1a (YP_002397850)         | 100/100(75) | IS1 repressor protein             |
| c1166 |             | 1263514..1263975                 | 44.8 | hypothetical protein,<br><i>Shewanella</i> sp. MR-7(YP_739732)            | 52/67(138)  | hypothetical protein              |
| c1167 |             | 1264005..1264922                 | 56.9 | putative transposase,<br><i>K. pneumoniae</i> (ACJ76652)                  | 89/95(278)  | transposase                       |
| c1168 |             | 1264958..1266313                 | 45.7 | hypothetical protein,<br><i>Shewanella</i> sp. MR-7(YP_739732)            | 72/85(444)  | hypothetical protein              |
| c1169 |             | 1266350..1266673                 | 53.7 | putative IS629 transposase OrfA,<br><i>E. coli</i> O103:H2 (YP_003225086) | 76/84(108)  | transposase                       |
| c1170 |             | 1266939..1267151                 | 56.8 | IS629, transposase orfB                                                   | 80/81(70)   | transposase                       |
| c1171 |             | complement<br>(1267100..1267450) | 54.7 | hypothetical protein,<br><i>E. coli</i> B171 (NP_053119)                  | 100/100(86) | hypothetical protein              |
| c1172 |             | 1267759..1269267                 | 53.6 | Group II intron-encoded reverse<br>transcriptase/maturase,                | 99/100(502) | reverse<br>transcriptase/maturase |

|       |             |                                  |      |                                                                                                           |              |                                   |
|-------|-------------|----------------------------------|------|-----------------------------------------------------------------------------------------------------------|--------------|-----------------------------------|
| c1173 |             | 1269432..1269806                 | 58.4 | <i>E. coli</i> IAI39 (YP_002406484)<br>integrase catalytic region,                                        | 98/98(124)   | remnant of integrase              |
| c1175 |             | complement<br>(1272784..1273764) | 55.7 | <i>E. coli</i> ATCC 8739(YP_001726350)<br>putative transposase,                                           | 99/99(325)   | transposase                       |
| c1176 |             | complement<br>(1273810..1274904) | 43.7 | <i>E. coli</i> APEC O1 (YP_001481374)<br>hypothetical protein,                                            | 42/61(361)   | hypothetical protein              |
| c1177 |             | complement<br>(1275069..1275455) | 55.8 | <i>Shewanella</i> sp. MR-7(YP_739732)<br>IS629 orfB,                                                      | 83/92(128)   | transposase                       |
| c1178 |             | complement<br>(1275632..1277140) | 53.6 | <i>Shigella flexneri</i> 2a2457T(NP_836758)<br>Group II intron-encoded reverse<br>transcriptase/maturase, | 99/100(502)  | reverse<br>transcriptase/maturase |
| c1179 |             | complement<br>(1277748..1278173) | 55.6 | <i>E. coli</i> IAI39 (YP_002406484)<br>integrase catalytic region,                                        | 97/98(120)   | remnant of integrase              |
| c1180 | <i>yecA</i> | 1279073..1279738                 | 52.9 | <i>E. coli</i> ATCC 8739(YP_001726350)<br>conserved protein,                                              | 100/100(221) | metal-binding protein             |
| c1181 | <i>tyrP</i> | complement<br>(1279800..1280951) | 51.2 | <i>E. coli</i> K12 (NP_416421)<br>tyrosine-specific transport protein,                                    | 99/99(383)   | tyrosine-specific permease        |
| c1182 | <i>fnA</i>  | complement<br>(1281478..1281975) | 43.0 | <i>E. coli</i> E24377A (YP_001463213)<br>ferritin-1,                                                      | 100/100(165) | iron-storage ferritin             |
| c1183 |             | complement<br>(1282122..1282625) | 52.6 | <i>E. coli</i> IHE3034 (CP001969)<br>IS1 transposase orfB,                                                | 99/99(167)   | transposase                       |
| c1184 |             | complement<br>(1282544..1282771) | 52.6 | <i>E. coli</i> SMS-3-5 (YP_001739974)<br>IS1 repressor protein Insa,                                      | 100/100(75)  | IS1 repressor protein             |
| c1185 |             | complement<br>(1283686..1284066) | 48.3 | <i>E. coli</i> SMS-3-5 (YP_002397850)<br>conserved hypothetical protein,                                  | 90/92(126)   | hypothetical protein              |
|       |             |                                  |      | <i>S. flexneri</i> 2a 301(AAN43500)                                                                       |              |                                   |

|       |             |                                  |      |                                                                                           |              |                                                         |
|-------|-------------|----------------------------------|------|-------------------------------------------------------------------------------------------|--------------|---------------------------------------------------------|
| c1186 | <i>yecI</i> | complement<br>(1284041..1284544) | 47.8 | ferritin-like protein,<br><i>E. coli</i> O157:H7 EDL933 (NP_288337)                       | 100/100(167) | ferritin                                                |
| c1187 | <i>araF</i> | 1285341..1286330                 | 51.4 | L-arabinose-binding periplasmic protein<br>precursor,<br><i>E. coli</i> UTI89 (YP_541108) | 99/100(329)  | L-arabinose-binding<br>periplasmic protein<br>precursor |
| c1188 | <i>araG</i> | 1286400..1287914                 | 52.2 | L-arabinose transporter ATP-binding protein,<br><i>E. coli</i> E24377A (YP_001463204)     | 99/99(504)   | L-arabinose transporter<br>ATP-binding protein          |
| c1189 | <i>araH</i> | 1288007..1288915                 | 50.5 | L-arabinose transporter permease protein,<br><i>E. coli</i> 83972 (ZP_04003480)           | 100/100(302) | L-arabinose transporter<br>permease protein             |
| c1190 | <i>otsB</i> | 1289271..1289882                 | 50.5 | trehalose-6-phosphate phosphatase,<br><i>E. coli</i> CFT073 (NP_754203)                   | 99/100(203)  | trehalose-6-phosphate<br>phosphatase                    |
| c1191 | <i>otsA</i> | 1289857..1291281                 | 49.3 | trehalose-6-phosphate synthase,<br><i>E. coli</i> K12 (NP_416410)                         | 100/100(474) | trehalose-6-phosphate<br>synthase                       |
| c1192 | <i>yecG</i> | complement<br>(1291288..1291716) | 45.2 | universal stress protein,<br><i>E. coli</i> 55989 (YP_002403126)                          | 99/99(142)   | universal stress protein                                |
| c1193 | <i>flhD</i> | 1292497..1292847                 | 46.7 | transcriptional activator FlhD,<br><i>E. coli</i> CFT073 (NP_754200)                      | 99/99(116)   | transcriptional activator                               |

---
